# Supplementary material
Source: publisher figshare collection journal article supplement (https://karger.figshare.com/ndownloader/files/18736502)
Supplement: Supplementary file 1 [file 18736502]

**Supplementary appendix**

**Table S4:** Final diagnosis of intrapulmonary lesions

| **Study [ref], year** | **Total EBUS performed, n** | **Final diagnosis: any malignancy, n** | **Final diagnosis: benign, n** | **Final diagnosis: missed, n** | **Incorrect diagnosis by**  **EBUS-TBNA, n** |
| --- | --- | --- | --- | --- | --- |
| Nakajima [14], 2008 | 35 | 34 (97%)  *-NSCLC (n=26)*  *-SCLC (n=1)*  *-Lung metastasis (n=6)*  *-BALT lymphoma (n=1)* | 1 (3%)  *-Focal fibrosis (n=1)* | 0 | 2 (6%)  *-NSCLC (adenocarcinoma) (n=1)*  *-Lung metastasis (n=1)* |
| Tournoy [15], 2008 | 60 | 58 (97%)  *-NSCLC (n=42)*  *-SCLC (n=14)*  *-Lymphoma (n=1)*  *-Atypical Carcinoid (n=1)* | 1 (2%)  *-Hamartoma (n=1)* | 1 (2%)  *-No confirmation obtained (n=1)* | 13 (22%)  *-NSCLC (n=7)*  *-SCLC (n=3)*  *-Lymphoma (n=1)*  *-Atypical carcinoid (n=1)*  *-Hamartoma (n=1)* |
| Khan [16], 2012 | 114 | 111 (97%)  *-Squamous cell carcinoma (n=35)*  *-Adenocarcinoma (n=32)*  *-SCLC (n=25),*  *-NSCLC-NOS (n=12)*  *-Malignant cells – NOS (n=3)*  *-Extra pulmonary metastases (n=2)*  *-Lymphoma (n=1)*  *-Not suitable for further invasive tests (follow up CT suggestive of lung malignancy) (n=1)* | 3 (3%)  *-Bronchial cysts (n=2)*  *-Benign at follow-up (n=1)* | 0 | 3 (3%)  *-Squamous cell carcinoma (n=1)*  *-Adenocarcinoma (n=1)*  *-Not suitable for further invasive tests (follow up CT suggestive of lung malignancy) (n=1)* |
| Batthi [17], 2013 | 32 | 32 (100%)  *-Squamous cell carcinoma (n=14)*  *-Adenocarcinoma (n=9)*  *-SCLC (n=5)*  *-Undifferentiated NSCLC (n=2)*  *-Large cell carcinoma (n=1)*  *-Features of both squamous cell and adenocarcinoma (n=1)* | 0 | 0 | 2 (6%)  *-NR* |
| Verma [18], 2013 | 37 | 33 (89%)  *-NSCLC (n=24)*  *-SCLC (n=7)*  *-Lymphoma (n=1)*  *-Malignant fibrous histiocytoma (n=1)* | 3 (8%)  *-Tuberculosis (n=1)*  *-Pneumonia (n=1)*  *-EBV related lymphoproliferative disorder (n=1)* | 1 (3%)  *-Indeterminate (patient refused evaluation) (n=1)* | 4 (11%)  *-Tuberculosis (n=1)*  *-Pneumonia (n=1)*  *-EBV related lymphoproliferative disorder (n=1)*  *-NSCLC (n=1)* |
| Yang [19], 2013 | 78 | 65 (83%)  *-Adenocarcinoma (n=36)*  *-Squamous cell carcinoma (n=8)*  *-Poorly-differentiated carcinoma (n=6)*  *-Unknown type carcinoma (n=3)*  *-SCLC (n=9)*  *-Pulmonary Sarcomatoid carcinoma (n=1)*  *-Metastatic lung cancer (n=2)*  *-Lymphoma (n=1)* | 13 (17%)  *-Pulmonary inflammation (n=7)*  *-Pulmonary tuberculosis (n=5)*  *-Fibrosis (n=1)* | 0 | 3 (4%)  *-Pulmonary Sarcomatoid carcinoma (n=1)*  *-Lymphoma (n=1)*  *-Poorly-differentiated carcinoma (n=1)* |
| Zhao [20], 2013 | 66 | 63 (95%)  *-NSCLC (n=51)*  *-SCLC (n=9)*  *-Lung metastasis (n=2)*  *-Lymphoma (n=1)* | 3 (5%)  *-Sclerosing hemangioma (n=2)*  *-Tubercoloma (n=1)* | 0 | 7 (11%)  *-Squamous cell carcinoma (n=3)*  *-Sclerosing hemangioma (n=2)*  *-Tuberculoma (n=1)*  *-Lymphoma (n=1)* |
| Evison [21], 2013 | 49 | 47 (95%)  *-NR* | NR | NR | 9 (19%)  *-NR* |
| Argento [22], 2016 | 32 | 30 (94%)  *-NSCLC (n=26)*  *-SCLC (n=1)*  *-Metastatic carcinoma (n=2)*  *-Lymphoma (n=1)* | 1 (3%)  *-Infection (S. aureus) (n=1)* | 1 (3%)  *-No definitive diagnosis (follow-up CT scan showed resolution of the lesion) (n=1)* | 4 (12%)  *-Adenocarcinoma (n=4)* |
| Chen [23], 2017 | 66 | 56 (85%)  *-Squamous cell carcinoma (n=8)*  *-Adenocarcinoma (n=25)*  *SCLC (n=6)*  *-Poorly differentiated carcinoma (n=5)*  *-Metastatic carcinoma (n=2)*  *-Large cell carcinoma (n=1)*  *-Adenosquamous carcinoma(n=1)*  *-Inconclusive type (n=8)* | 10 (14%)  *-Lung abscess (n=2)*  *-Organizing pneumonia (n=1)*  *-Pulmonary aspergillosis (n=2)*  *-Pneumonia (n=3)*  *-Granuloma (n=2)* | 0 | 10 (14%)  *-Adenocarcinoma (n=4)*  *-SCLC (n=2)*  *-Adenosquamous carcinoma (n=1)*  *-Metastatic carcinoma (n=1)*  *-Granuloma (n=2)* |
